## **Pregnancy is a drag: hydrodynamics, kinematics and performance in pre- and post-parturition bottlenose dolphins (*Tursiops truncatus*)**

Shawn R. Noren, Jessica V. Redfern and Elizabeth F. Edwards

10.1242/jeb.069120

There was an error published in *J. Exp. Biol.* **214**, 4151-4159.

In the Abstract, the value for the mean increase in frontal surface during pregnancy should have read  $56\pm 13\%$  (not  $51\pm 14\%$ ). This is the only place that this error occurred; the values reported for the increase in frontal surface area for each individual dolphin are correct as reported in the Results section.

The authors apologise for any inconvenience that this error may have caused but assure readers that it does not affect the data, results, interpretations or conclusions of the paper.
